# Supplementary material
Source: HighWire-hosted journal article supplement (https://jnm.snmjournals.org/highwire/filestream/103980/field_highwire_adjunct_files/0/255794_Supplemental_Data.pdf)
Supplement: 255794_Supplemental_Data.pdf [file 255794_Supplemental_Data.pdf]

## Cyclotron produced $^{132}\text{La}$ as a PET imaging surrogate of therapeutic $^{225}\text{Ac}$

Eduardo Aluicio-Sarduy<sup>1</sup>, Todd E. Barnhart<sup>1</sup>, Jamey Weichert<sup>2</sup>, Reinier Hernandez<sup>1,2</sup> and Jonathan W. Engle<sup>1,2\*</sup>.

<sup>1</sup>Departments of Medical Physics, University of Wisconsin Madison

<sup>2</sup>Departments of Radiology, University of Wisconsin Madison

\*Corresponding author: Jonathan W. Engle (Assistant Professor), Department of Medical Physics and Department of Radiology, University of Wisconsin-Madison. 1111 Highland Avenue B1303 WIMR Cyclotron Laboratory, Madison WI 53705, USA. Email: [jwengle@wisc.edu](mailto:jwengle@wisc.edu). Tel: (608)-263-5805

### Supplementary information

**Table S1:** [ $^{132}\text{La}$ ]-NM600 and [ $^{225}\text{Ac}$ ]-NM600 mouse serum stability quantified by r-TLC (n = 3, mean  $\pm$  SD).

| Time (h)<br>p.i. | Stability (%)               |                             |
|------------------|-----------------------------|-----------------------------|
|                  | [ $^{132}\text{La}$ ]-NM600 | [ $^{225}\text{Ac}$ ]-NM600 |
| 0                | 99.0 $\pm$ 0.7              | 98.8 $\pm$ 0.3              |
| 4                | 98.7 $\pm$ 0.6              | 98.7 $\pm$ 0.1              |
| 24               | 98.9 $\pm$ 0.7              | 97.7 $\pm$ 0.6              |

**Table S2:** [ $^{132}\text{La}$ ]-NM600 tissue uptake quantification of hand-drawn PET ROIs (n = 3, mean  $\pm$  SD).

| Tissue      | Uptake (%IA/g) |                |                |
|-------------|----------------|----------------|----------------|
|             | 4h p.i.        | 10h p.i.       | 24h p.i.       |
| Heart/blood | 17.8 $\pm$ 1.3 | 13.8 $\pm$ 1.3 | 7.3 $\pm$ 0.8  |
| Muscle      | 1.5 $\pm$ 0.3  | 1.8 $\pm$ 0.3  | 1.1 $\pm$ 0.1  |
| Bone        | 2.5 $\pm$ 0.3  | 2.2 $\pm$ 0.2  | 1.9 $\pm$ 0.3  |
| Liver       | 12.8 $\pm$ 0.4 | 18.3 $\pm$ 0.5 | 16.1 $\pm$ 0.6 |
| Kidney      | 7.0 $\pm$ 0.4  | 7.6 $\pm$ 0.5  | 6.4 $\pm$ 0.5  |
| 4T1 tumor   | 5.1 $\pm$ 0.4  | 7.6 $\pm$ 0.5  | 11.5 $\pm$ 1.3 |

**Table S3:** *Ex vivo* [<sup>225</sup>Ac]-NM600 biodistribution at 4 and 24h p.i., and [<sup>13x</sup>La]-NM600 24h p.i., measured by gamma counting (n = 3, mean ± SD).

| Tissue      | Uptake (%IA/g)                        |                                        |                                        |
|-------------|---------------------------------------|----------------------------------------|----------------------------------------|
|             | [ <sup>225</sup> Ac]-NM600<br>4h p.i. | [ <sup>225</sup> Ac]-NM600<br>24h p.i. | [ <sup>13x</sup> La]-NM600<br>24h p.i. |
| Blood/Heart | 16.8 ± 0.8                            | 5.7 ± 0.3                              | 9.9 ± 0.2                              |
| Skin        | 2.2 ± 0.2                             | 1.8 ± 0.5                              | 2.7 ± 0.1                              |
| Muscle      | 0.8 ± 0.2                             | 0.6 ± 0.1                              | 1.0 ± 0.2                              |
| Bone        | 1.8 ± 0.4                             | 2.0 ± 0.6                              | 1.7 ± 0.1                              |
| Heart       | 5.2 ± 0.1                             | 3.2 ± 0.3                              | 3.7 ± 0.2                              |
| Lung        | 5.9 ± 1.7                             | 2.5 ± 0.6                              | 7.0 ± 1.1                              |
| Liver       | 11.9 ± 0.6                            | 17.5 ± 0.3                             | 17.1 ± 0.9                             |
| Kidney      | 6.1 ± 1.8                             | 7.0 ± 0.7                              | 9.0 ± 0.3                              |
| Spleen      | 2.2 ± 0.6                             | 3.8 ± 0.1                              | 4.6 ± 0.7                              |
| Pancreas    | 1.8 ± 0.8                             | 1.5 ± 0.2                              | 1.7 ± 0.4                              |
| Stomach     | 1.6 ± 0.2                             | 1.3 ± 0.6                              | 1.23 ± 0.6                             |
| Intestine   | 1.8 ± 0.1                             | 1.7 ± 0.2                              | 1.5 ± 0.4                              |
| 4T1 tumor   | 4.6 ± 0.4                             | 11.5 ± 2.1                             | 11.1 ± 0.8                             |
| Brain       | 0.66 ± 0.06                           | 0.29 ± 0.01                            | 0.31 ± 0.02                            |
| Thymus      | 1.6 ± 0.5                             | 1.6 ± 0.1                              | 2.1 ± 1.1                              |
